# Supplementary material for: Internet Search and Krokodil in the Russian Federation: An Infoveillance Study
Source: PubMed Central journal article supplement (PMC4180331; doi:10.2196/jmir.3203), 2014-09-18
Supplement: jmir_v16i9e212_app1.pdf [file jmir_v16i9e212_app1.pdf]

Codes 1=Preparation & Use, 2 = Images & information, 3= Ambiguous

| Russian term                        | English term                                 | Searches | Code |
|-------------------------------------|----------------------------------------------|----------|------|
| дезоморфин состав                   | Components desomorphine                      | 334      | 1    |
| приготовление дезоморфина           | Preparation desomorphine                     | 330      | 1    |
| дезоморфин изготовление             | Desomorphine preparation                     | 214      | 1    |
| дезоморфин рецепт                   | Desomorphine recipe                          | 260      | 1    |
| употребление дезоморфина            | Consumption desomorphine                     | 272      | 1    |
| как приготовить дезоморфин          | How to prepare desomorphine                  | 160      | 1    |
| дезоморфин способ                   | Desomorphine method                          | 229      | 1    |
| как варить дезоморфин               | How to cook desomorphine                     | 166      | 1    |
| дезоморфин +как варить              | Desomorphine how to cook                     | 134      | 1    |
| состав дезоморфина                  | Components desomorphine                      | 124      | 1    |
| дезоморфин +как сделать             | Desomorphine how to make                     | 121      | 1    |
| способ приготовления дезоморфин     | Method of preparing desomorphine             | 115      | 1    |
| как изготовить дезоморфин           | How to prepare desomorphine                  | 111      | 1    |
| дезоморфин способ изготовления      | Desomorphine method preparation              | 101      | 1    |
| как сварить дезоморфин              | How to cook up desomorphine                  | 94       | 1    |
| как сделать дезоморфин              | How to make desomorphine                     | 92       | 1    |
| синтез дезоморфина                  | Synthesis desomorphine                       | 39       | 1    |
| дезоморфин способ приготовления     | Desomorphine method of preparation           | 80       |      |
| дезоморфин форум                    | Desomorphine forum                           | 77       | 1    |
| коаксил дезоморфин                  | Coaxil desmorphine                           | 63       | 1    |
| как готовить дезоморфин             | How to prepare desomorphine                  | 52       | 1    |
| получение дезоморфина               | Getting desomorphine                         | 56       | 1    |
| дезоморфин +в домашних условиях     | Desomorphine in domestic conditions          | 54       | 1    |
| из чего делают дезоморфин           | What is desomorphine made from               | 51       | 1    |
| действие дезоморфина                | Desomorphine action                          | 25       | 1    |
| дезоморфин запах                    | Desomorphine smell                           | 45       | 1    |
| дезоморфин купить                   | Desomorphine buy                             | 43       | 1    |
| рецепт приготовления дезоморфина    | Recipe for preparing desomorphine            | 39       | 1    |
| дезоморфин лечение                  | Desomorphine treatment                       | 38       | 1    |
| сухой остаток дезоморфин            | Drug residue desomorphine                    | 38       | 1    |
| сколько держится дезоморфин +в моче | How long is desomorphine detectable in urine | 33       | 1    |
| из чего делают дезоморфин           | What is desomorphine made from               | 31       | 1    |
| рецепт изготовления дезоморфина     | Recipe for preparing desomorphine            | 31       | 1    |
| под дезоморфином                    | Stoned on desomorphine                       | 26       | 1    |
| колется дезоморфином                | Injecting desomorphine                       | 23       | 1    |

|                                            |                                              |     |   |
|--------------------------------------------|----------------------------------------------|-----|---|
| дезоморфин эффект                          | Desomorphine effect                          | 23  | 1 |
| сколько держится +в крови дезоморфин       | How long is desomorphine detectable in blood | 10  | 1 |
| дезоморфин инструкция                      | Desomorphine instructions                    | 21  | 1 |
| сбыт дезоморфина                           | Sale desomorphine                            | 23  | 1 |
| как приготовить дезоморфин видео           | How to prepare desomorphine video            | 8   | 1 |
| дезоморфин реакция                         | Desomorphine reaction                        | 18  | 1 |
| дезоморфин ингредиенты                     | Desomorphine ingredients                     | 18  | 1 |
| дезоморфин приход                          | Desomorphine effects                         | 16  | 1 |
| варка дезоморфина                          | Cooking desomorphine                         | 15  | 1 |
| дезоморфин ощущения                        | Desomorphine feelings                        | 14  | 1 |
| признаки употребления дезоморфина          | Signs of desomorphine use                    | 15  | 1 |
| дезоморфин симптомы                        | Desomorphine symptoms                        | 13  | 1 |
| дезоморфин формула                         | Desomorphine formula                         | 11  | 1 |
| производство дезоморфина                   | Production of desomorphine                   | 15  | 1 |
| инструкция +по изготовлению дезоморфина    | Instructions for preparing desomorphine      | 7   | 1 |
| как избавиться от запаха дезоморфина       | How to get rid of the smell of desomorphine  | 7   | 1 |
| дезоморфин цена                            | Desomorphine price                           | 6   | 1 |
| дезоморфин видео                           | Desomorphine video                           | 673 | 2 |
| дезоморфин фото                            | Desomorphine photo                           | 206 | 2 |
| наркоманы дезоморфин                       | Junkies desomorphine                         | 155 | 2 |
| последствия употребления дезоморфина видео | Consequences of desomorphine use video       | 117 | 2 |
| последствия дезоморфина фото               | Consequences of desomorphine use photo       | 69  | 2 |
| последствия приема дезоморфина             | Consequences of taking desomorphine          | 61  | 2 |
| фильм дезоморфин                           | Desomorphine film                            | 61  | 2 |
| смотреть видео дезоморфин                  | Watch video desomorphine                     | 25  | 2 |
| дезоморфин смотреть онлайн                 | Desomorphine watch online                    | 19  | 2 |
| видео наркоманы дезоморфин                 | Video junkies desomorphine                   | 27  | 2 |
| наркоманы употребляющие дезоморфин         | Junkies using desomorphine                   | 26  | 2 |
| смотреть +про дезоморфин                   | Watch about desomorphine                     | 20  | 2 |
| дезоморфин наркотик видео                  | Desomorphine drug video                      | 18  | 2 |
| ютуб дезоморфин                            | Youtube desomorphine                         | 23  | 2 |
| дезоморфин видео онлайн                    | Desomorphine video online                    | 10  | 2 |
| крокодил дезоморфин видео                  | Krokodil desomorphine video                  | 13  | 2 |
| дезоморфин документальный фильм            | Desomorphine documentary film                | 11  | 2 |
| крокодил дезоморфин                        | Krokodil desomorphine                        | 232 | 3 |
| последствия дезоморфина                    | Consequences desomorphine                    | 748 | 3 |
| наркотик дезоморфин                        | Drug desomorphine                            | 199 | 3 |

|                                      |                                        |       |   |
|--------------------------------------|----------------------------------------|-------|---|
| дезоморфин крокодил                  | Desomorphine krokodil                  | 327   | 3 |
| последствия дезоморфина видео        | Consequences desomorphine video        | 186   | 3 |
| последствия употребления дезоморфина | Consequences of consuming desomorphine | 209   | 3 |
| человек дезоморфин                   | Person desomorphine                    | 92    | 3 |
| скачать дезоморфин                   | Download desomorphine                  | 54    | 3 |
| дезоморфин 2013                      | Desomorphine 2013                      | 52    | 3 |
| кодеин дезоморфин                    | Codeine desomorphine                   | 51    | 3 |
| онлайн дезоморфин                    | Online desomorphine                    | 47    | 3 |
| дезоморфин википедия                 | Desomorphine wikipedia                 | 43    | 3 |
| дезоморфин крокодил наркотик         | Desomorphine krokodil drug             | 43    | 3 |
| остеомиелит дезоморфин               | Osteomyelitis desomorphine             | 33    | 3 |
| дезоморфин остеонекроз               | Desomorphine ostreonecrosis            | 29    | 3 |
| жертвы дезоморфина                   | Victims of desomorphine                | 30    | 3 |
| смерть +от дезоморфина               | Death from desomorphine                | 24    | 3 |
| дезоморфин лурк                      | Desomorphine lurk                      | 20    | 3 |
| последствия после дезоморфина        | Consequences after desomorphine        | 19    | 3 |
| как выглядит дезоморфин              | What does desomorphine look like       | 11    | 3 |
| последствия применения дезоморфина   | Consequences using desomorphine        | 11    | 3 |
| наркотик дезоморфин крокодил         | Drug desomorphine krokodil             | 8     | 3 |
| кто придумал дезоморфин              | Who thought up desomorphine            | 8     | 3 |
|                                      | Total word combination searches        | 6333  |   |
|                                      | Single word searches "desomorphine"    | 5701  | - |
|                                      | Total all searches November 2013       | 12034 | - |
