# Supplementary material for: Internet Search and Krokodil in the Russian Federation: An Infoveillance Study
Source: PubMed Central journal article supplement (PMC4180331; doi:10.2196/jmir.3203), 2014-09-18
Supplement: jmir_v16i9e212_app2.pdf [file jmir_v16i9e212_app2.pdf]

|                                 | Pre -Ban<br>6 - 0 months<br>Dec 11-May 12 | Post - ban<br>1- 6 months<br>Mean<br>July 12 -Dec 12 | Post - ban<br>1- 6 months<br>% change<br>July 12 -Dec 12<br>(relative to pre-<br>ban) | Post-ban<br>8 -13 months<br>Mean<br>March-August<br>2013 | Post-ban<br>8 -13 months<br>cumulative<br>% change<br>March-August<br>2013<br>(relative to pre-<br>ban) |
|---------------------------------|-------------------------------------------|------------------------------------------------------|---------------------------------------------------------------------------------------|----------------------------------------------------------|---------------------------------------------------------------------------------------------------------|
| <b>NATIONAL</b>                 | <b>16.667</b>                             | <b>9.651</b>                                         | <b>- 42.095</b>                                                                       | <b>8.747</b>                                             | <b>-47.519</b>                                                                                          |
| Central                         | 14.389                                    | 7.930                                                | -55.111                                                                               | 6.544                                                    | -54.520                                                                                                 |
| Belgorod                        | 10.161                                    | 5.590                                                | -44.989                                                                               | 3.965                                                    | -60.981                                                                                                 |
| Bryansk                         | **20.704                                  | **10.656                                             | -48.529                                                                               | 7.148                                                    | -65.473                                                                                                 |
| Vladimir                        | 12.230                                    | 6.495                                                | -46.896                                                                               | 5.140                                                    | -57.975                                                                                                 |
| Voronezh                        | 9.953                                     | 7.207                                                | -27.586                                                                               | 5.641                                                    | -43.319                                                                                                 |
| Ivanovo                         | 11.460                                    | 8.068                                                | -29.599                                                                               | 8.337                                                    | -27.248                                                                                                 |
| Kaluga                          | 9.518                                     | 5.628                                                | -40.870                                                                               | 4.320                                                    | -54.609                                                                                                 |
| Kostroma                        | **18.638                                  | 6.290                                                | -66.252                                                                               | 7.051                                                    | -62.167                                                                                                 |
| Kursk                           | **22.060                                  | 8.420                                                | -61.834                                                                               | 7.839                                                    | -64.464                                                                                                 |
| Lipetsk                         | 13.416                                    | 9.292                                                | -30.736                                                                               | 5.469                                                    | -59.232                                                                                                 |
| Moscow Region                   | 4.482                                     | 3.947                                                | -11.949                                                                               | 2.269                                                    | -49.389                                                                                                 |
| Orel                            | 12.737                                    | **10.061                                             | -21.008                                                                               | 5.159                                                    | -59.496                                                                                                 |
| Ryazan                          | **22.851                                  | **12.211                                             | -46.565                                                                               | **12.080                                                 | -47.137                                                                                                 |
| Smolensk                        | 9.766                                     | 4.415                                                | -54.799                                                                               | 4.721                                                    | -51.658                                                                                                 |
| Tambov                          | 12.896                                    | 5.699                                                | 55.808                                                                                | 3.660                                                    | -71.617                                                                                                 |
| Tver                            | 8.345                                     | 4.534                                                | -45.672                                                                               | 3.786                                                    | -54.627                                                                                                 |
| Tula                            | 10.898                                    | 5.427                                                | -50.199                                                                               | 4.084                                                    | -62.525                                                                                                 |
| Yaroslavl                       | **17.645                                  | 8.206                                                | -53.492                                                                               | 6.253                                                    | -64.562                                                                                                 |
| MoscowCity                      | **31.245                                  | **20.586                                             | -34.114                                                                               | **20.874                                                 | -33.192                                                                                                 |
| North Western<br>Federal Region | 16.293                                    | 9.134                                                | -43.939                                                                               | 6.552                                                    | -59.787                                                                                                 |
| Karelia                         | 16.398                                    | 6.684                                                | -59.236                                                                               | 3.421                                                    | -79.140                                                                                                 |
| Komi                            | **26.622                                  | **14.968                                             | -43.777                                                                               | **11.447                                                 | -57.001                                                                                                 |
| Archangelsk                     | 16.295                                    | 8.927                                                | -45.216                                                                               | 7.934                                                    | -51.312                                                                                                 |
| Nenets Autonomous<br>Region     | 5.476                                     | 4.302                                                | -21.429                                                                               | 2.738                                                    | -50.000                                                                                                 |
| Vologda                         | **34.061                                  | **17.998                                             | -47.160                                                                               | **15.152                                                 | -55.516                                                                                                 |
| Kaliningrad                     | 8.642                                     | 5.855                                                | -32.252                                                                               | 4.347                                                    | -49.696                                                                                                 |
| Leningrad                       | 1.645                                     | 1.110                                                | -32.558                                                                               | 1.138                                                    | -30.814                                                                                                 |
| Murmansk                        | **28.948                                  | **13.517                                             | -53.304                                                                               | **8.778                                                  | -69.677                                                                                                 |
| Novgorod                        | 12.132                                    | 7.407                                                | -38.950                                                                               | 5.256                                                    | -56.674                                                                                                 |
| Pskov                           | 6.825                                     | 3.111                                                | -54.412                                                                               | 2.534                                                    | -62.868                                                                                                 |
| St. Petersburg City             | **22.185                                  | **16.598                                             | -25.184                                                                               | **9.328                                                  | -57.956                                                                                                 |
| Southern Federal<br>Region      | 8.220                                     | 5.007                                                | -39.091                                                                               | 4.501                                                    | -45.245                                                                                                 |
| Adygia                          | 2.819                                     | 1.842                                                | -34.667                                                                               | 2.142                                                    | -24.000                                                                                                 |
| Kalmykia                        | 2.336                                     | 1.401                                                | -40.000                                                                               | 2.453                                                    | -5.000                                                                                                  |
| Krasnodar                       | 7.402                                     | 4.610                                                | -37.717                                                                               | 3.344                                                    | -54.815                                                                                                 |
| Astrakhan                       | 9.349                                     | 4.338                                                | -53.603                                                                               | 3.713                                                    | -60.281                                                                                                 |
| Volgograd                       | 9.895                                     | 5.215                                                | -47.300                                                                               | 2.968                                                    | -70.007                                                                                                 |
| Rostov                          | **17.521                                  | **12.636                                             | -27.882                                                                               | **12.386                                                 | -29.312                                                                                                 |
| North Caucasus                  | 3.168                                     | 2.278                                                | -28.105                                                                               | 2.272                                                    | -28.282                                                                                                 |

|                         |           |          |         |          |          |
|-------------------------|-----------|----------|---------|----------|----------|
| Federal Region          |           |          |         |          |          |
| Dagestan                | 6.126     | 3.880    | -36.667 | 3.279    | -46.481  |
| Ingushetia              | 0.115     | 0.115    | 0.000   | 0.420    | -266.667 |
| Kabardino-Balkaria      | 1.882     | 2.348    | -24.742 | 2.154    | -14.433  |
| Karachayevo-Cherkessiya | 1.620     | 1.831    | -13.043 | 2.782    | -71.739  |
| Northern Ossetiya       | 6.713     | 4.004    | 40.351  | 3.934    | -41.404  |
| Chechnya                | 0.964     | 0.952    | 1.316   | 0.964    | 0.000    |
| Stavropol               | 4.757     | 2.815    | -40.829 | 2.372    | -50.126  |
| Volga Federal Region    | 14.789    | 7.755    | -47.563 | 6.852    | -53.669  |
| Bashkortostan           | 16.562    | 9.169    | -44.637 | 7.196    | -56.552  |
| MariyEl                 | 10.679    | 7.304    | -31.603 | 4.869    | -54.402  |
| Mordovia                | 7.259     | 3.427    | -52.793 | 6.387    | -12.011  |
| Tatarstan               | 6.583     | 3.331    | -49.402 | 2.925    | -55.578  |
| Udmurtiya               | 12.484    | 6.193    | -50.396 | 4.645    | -62.797  |
| Chuvashiya              | 10.667    | 6.987    | -34.504 | 6.023    | -43.538  |
| Perm                    | **29.468  | **13.053 | -55.704 | **9.705  | -67.068  |
| Kirov                   | 8.286     | 4.659    | -43.769 | 5.125    | -38.146  |
| Nizhegorod              | **18.633  | **11.604 | -37.724 | 9.362    | -49.756  |
| Orenburg                | **21.561  | 7.616    | -64.677 | 7.822    | -63.720  |
| Penza                   | 13.600    | 7.383    | -45.714 | 6.326    | -53.482  |
| Samara                  | **16.757  | 10.668   | -36.335 | **12.405 | -25.967  |
| Saratov                 | **19.160  | 8.440    | -55.953 | 6.238    | -67.442  |
| Ulyanovsk               | 15.346    | 8.736    | -43.076 | 6.897    | -55.055  |
| Urals Federal Region    | **35.290  | **19.335 | -45.209 | **13.478 | -61.807  |
| Kurgan                  | 10.104    | 7.018    | -30.540 | 4.384    | -56.611  |
| Sverdlovsk              | **146.898 | **81.098 | -44.793 | **54.304 | -63.033  |
| Tyumen                  | 8.669     | 3.741    | -56.846 | 2.768    | -68.072  |
| Khanty-Mansiysk         | **20.159  | **11.952 | -40.710 | **10.132 | -49.739  |
| Yamalo-Nenetsk          | 11.632    | 5.785    | -50.265 | 4.647    | -60.053  |
| Chelyabinsk             | 14.274    | 6.417    | -55.042 | 4.634    | -67.538  |
| Siberian Federal Region | 12.428    | 6.073    | -51.134 | 4.475    | -63.995  |
| Altay Republic          | 2.615     | 1.268    | -51.515 | 0.713    | -72.727  |
| Buryatiya               | 6.328     | 2.744    | 56.640  | 3.001    | -52.575  |
| Tyva                    | 3.060     | 0.966    | -68.421 | 0.752    | -75.439  |
| Khakasiya               | 14.665    | 8.067    | -44.989 | 6.723    | -54.158  |
| Altay Region            | **17.801  | 8.060    | -54.723 | 5.892    | -66.901  |
| Zabaykal                | 12.586    | 4.368    | -65.296 | 3.470    | -72.430  |
| Krasnoyarsk             | **26.319  | **12.887 | -51.034 | 7.056    | -73.192  |
| Irkutsk                 | 7.879     | 4.521    | -42.620 | 4.280    | -45.677  |
| Kemerovo                | 8.004     | 4.582    | -42.749 | 3.871    | -51.632  |
| Novosibirsk             | **20.871  | **12.383 | -40.672 | 8.495    | -59.299  |
| Omsk                    | 14.168    | 6.847    | -51.669 | 4.796    | -66.150  |
| Tomsk                   | 14.846    | 6.186    | -58.333 | 4.651    | -68.671  |
| Far East Federal Region | 6.663     | 3.896    | -41.538 | 2.500    | -62.475  |
| Sakha (Yakutiya)        | 6.087     | 1.866    | -69.341 | 1.953    | -67.908  |
| Kamchatka               | 3.952     | 3.484    | -11.842 | 1.560    | -60.526  |
| Primorsk                | 9.809     | 4.451    | -54.625 | 4.006    | -59.162  |

|                          |        |         |          |       |         |
|--------------------------|--------|---------|----------|-------|---------|
| Khabarovsk               | 12.294 | **9.798 | -20.303  | 7.352 | -40.202 |
| Amursk                   | 3.836  | 1.755   | -54.255  | 1.306 | -65.957 |
| Magadan                  | 3.829  | 2.297   | -40.000  | 0.328 | -91.429 |
| Sakhalin                 | 14.393 | 7.027   | -51.174  | 4.358 | -69.718 |
| Jewish Autonomous Region | 5.116  | 2.413   | -52.830  | 1.641 | -67.925 |
| Chukhotka                | 0.656  | 1.969   | +200.000 | 0.000 | 100.000 |
